# Supplementary material for: Fecal microbiota transplantation alters the susceptibility of obese rats to type 2 diabetes mellitus
Source: publisher site journal article supplement (doi:10.18632/aging.103756), 2020-09-09
Supplement: Supplementary file [file aging-v12i17-103756-supplementary-material-SD1.pdf]

**SUPPLEMENTARY FIGURES**

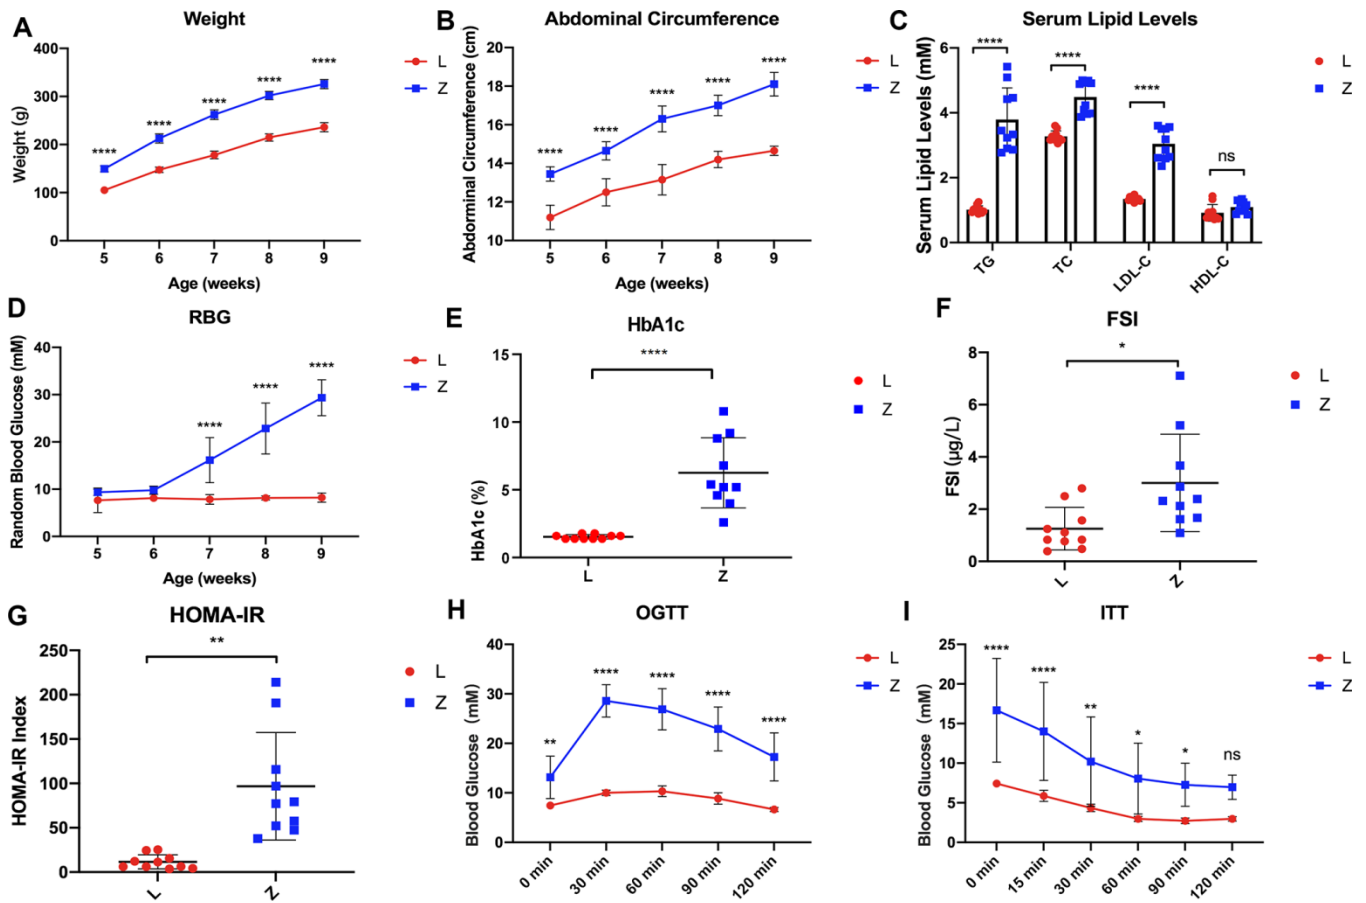

**Supplementary Figure 1. Basic information of the donor group rats.** (A) Body weight (g; Time:  $F_{4, 45} = 1254, P < 0.0001$ ; Group:  $F_{1, 45} = 1972, P < 0.0001$ ; Interaction:  $F_{4, 45} = 26.78, P < 0.0001$ ); (B) Abdominal circumference (cm; Time:  $F_{4, 45} = 179.3, P < 0.0001$ ; Group:  $F_{1, 45} = 535.6, P < 0.0001$ ; Interaction:  $F_{4, 45} = 4.437, P = 0.0042$ ); (C) TG (mM;  $t = 13.79, P < 0.0001$ ), TC (mM;  $t = 6.024, P < 0.0001$ ), LDL (mM;  $t = 8.414, P < 0.0001$ ), and HDL (mM;  $t = 0.8776, P > 0.05$ ); (D) Random blood glucose (mM; Time:  $F_{4, 45} = 48.78, P < 0.0001$ ; Group:  $F_{1, 45} = 304.2, P < 0.0001$ ; Interaction:  $F_{4, 45} = 48.17, P < 0.0001$ ); (E) Glycosylated hemoglobin (%;  $t = 5.757, P < 0.0001$ ); (F) Fasting serum insulin ( $\mu\text{g/L}$ ;  $t = 2.717, P < 0.05$ ); (G) HOMA-IR index ( $t = 4.437, P < 0.01$ ); (H) Oral glucose tolerance (mM; Time:  $F_{4, 45} = 37.46, P < 0.0001$ ; Group:  $F_{1, 45} = 426.5, P < 0.0001$ ; Interaction:  $F_{4, 45} = 12.86, P < 0.0001$ ); (I) Insulin tolerance (mM; Time:  $F_{5, 54} = 14.72, P < 0.0001$ ; Group:  $F_{1, 54} = 92.95, P < 0.0001$ ; Interaction:  $F_{5, 54} = 1.799, P = 0.1287$ ) comparison of donor LZ and ZDF rats.  $n = 10$ . Statistical analysis was performed with two-way ANOVA in (A, B, D, H, I) and Student's t-test followed by Tukey's test in (C, E, F, G). \* $P < 0.05$ , \*\* $P < 0.01$ , \*\*\* $P < 0.001$ , \*\*\*\* $P < 0.0001$ . The data are expressed as the mean  $\pm$  SD.

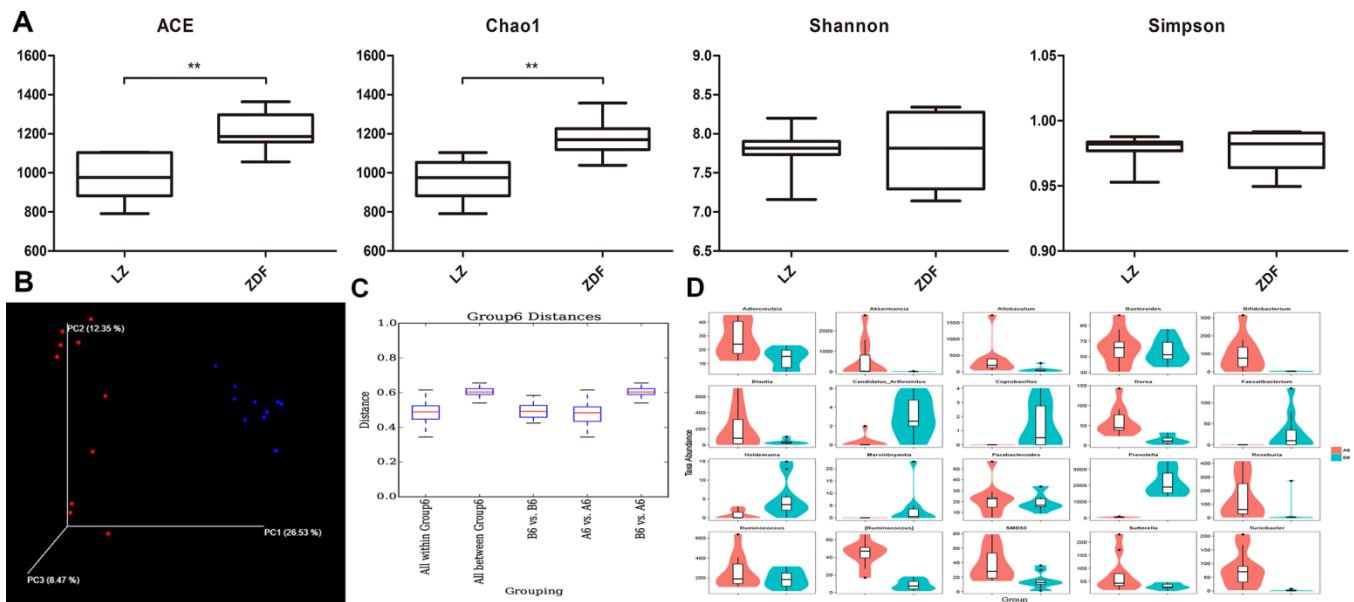

**Supplementary Figure 2. Intestinal microbiota structure of the donor group.** (A) Comparison of  $\alpha$ -diversity between donor LZ and ZDF rats (ACE:  $t = -4.121$ ,  $P = 0.001$ ; Chao1:  $t = -3.963$ ,  $P = 0.002$ ; Shannon:  $t = -1.600$ ,  $P = 0.136$ ; Simpson:  $t = 0.292$ ,  $P = 0.774$ ); (B) Three-dimensional sequence diagram of samples of Unweighted UniFrac PCoA analysis of LZ and ZDF rats ( $n = 10$ ); (C) Box plot of the difference in UniFrac distance values for different groups corresponding to the two groups of rats ( $n = 10$ ); (D) Violin map of the abundance distribution of the top 20 taxa with the most significant difference between the sample groups ( $n = 10$ ). Red, LZ group; Blue, ZDF group. Statistical analysis was performed with Student's t-test, and Monte Carlo permutation test, or Student's t-test followed by Tukey's test. \* $P < 0.05$ , \*\* $P < 0.01$ , \*\*\* $P < 0.001$ , \*\*\*\* $P < 0.0001$ . The data are expressed as the mean  $\pm$  SD.

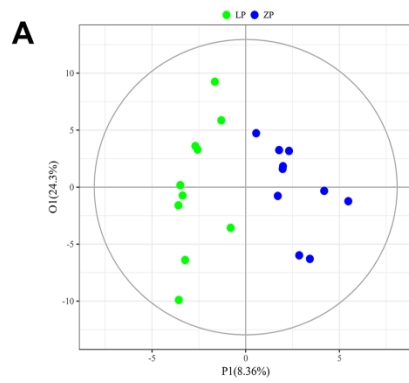

**A**  
OPLS-DA predictive/discriminate score plot 1P+1O; R2Y=0.834, Q2Y= 0.308

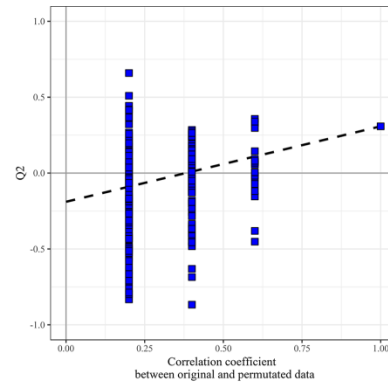

1000 permutation test intercept of Q2 in y-axis is -0.189

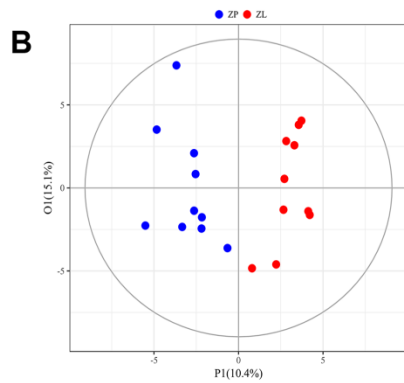

**B**  
OPLS-DA predictive/discriminate score plot 1P+1O; R2Y=0.871, Q2Y= 0.33

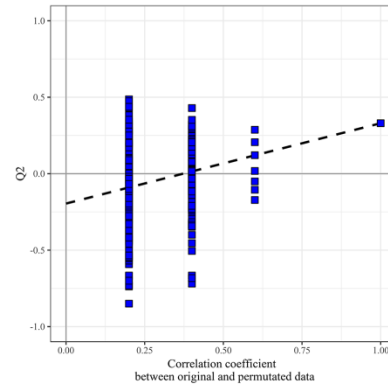

1000 permutation test intercept of Q2 in y-axis is -0.195

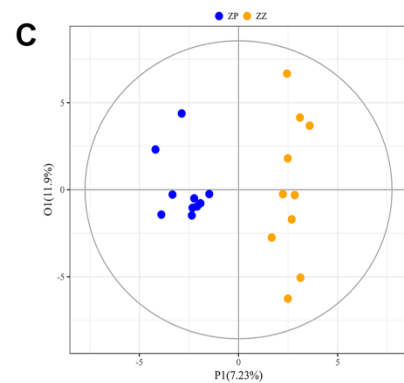

**C**  
OPLS-DA predictive/discriminate score plot 1P+1O; R2Y=0.937, Q2Y= 0.0613

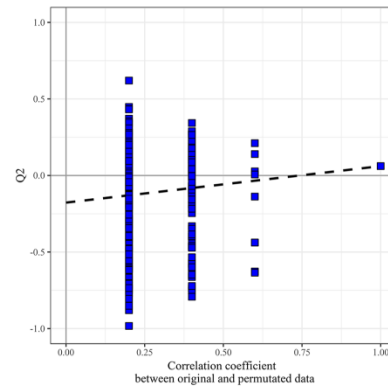

1000 permutation test intercept of Q2 in y-axis is -0.177

**Supplementary Figure 3. Orthogonal partial least squares discriminant analysis (OPLS-DA) among the normal group, model group, and intervention group. (A) Diagnostic parameters and regression curves of pairwise comparison between the L-P group and Z-P group; (B) the Z-P group and Z-Lg group; (C) the Z-P group and Z-Zg group.**
